# Supplementary material for: Challenges in isolating silica particles from organic food matrices with microwave-assisted acidic digestion
Source: PubMed Central journal article supplement (PMC6704109; doi:10.1007/s00216-019-01964-2), 2019-06-21
Supplement: 216_2019_1964_MOESM1_ESM.pdf [file 216_2019_1964_MOESM1_ESM.pdf]

## **Analytical and Bioanalytical Chemistry**

### **Electronic Supplementary Material**

#### **Challenges in isolating silica particles from organic food matrices with microwave-assisted acidic digestion**

Otmar Geiss, Ivana Bianchi, Chiara Senaldi, Josefa Barrero

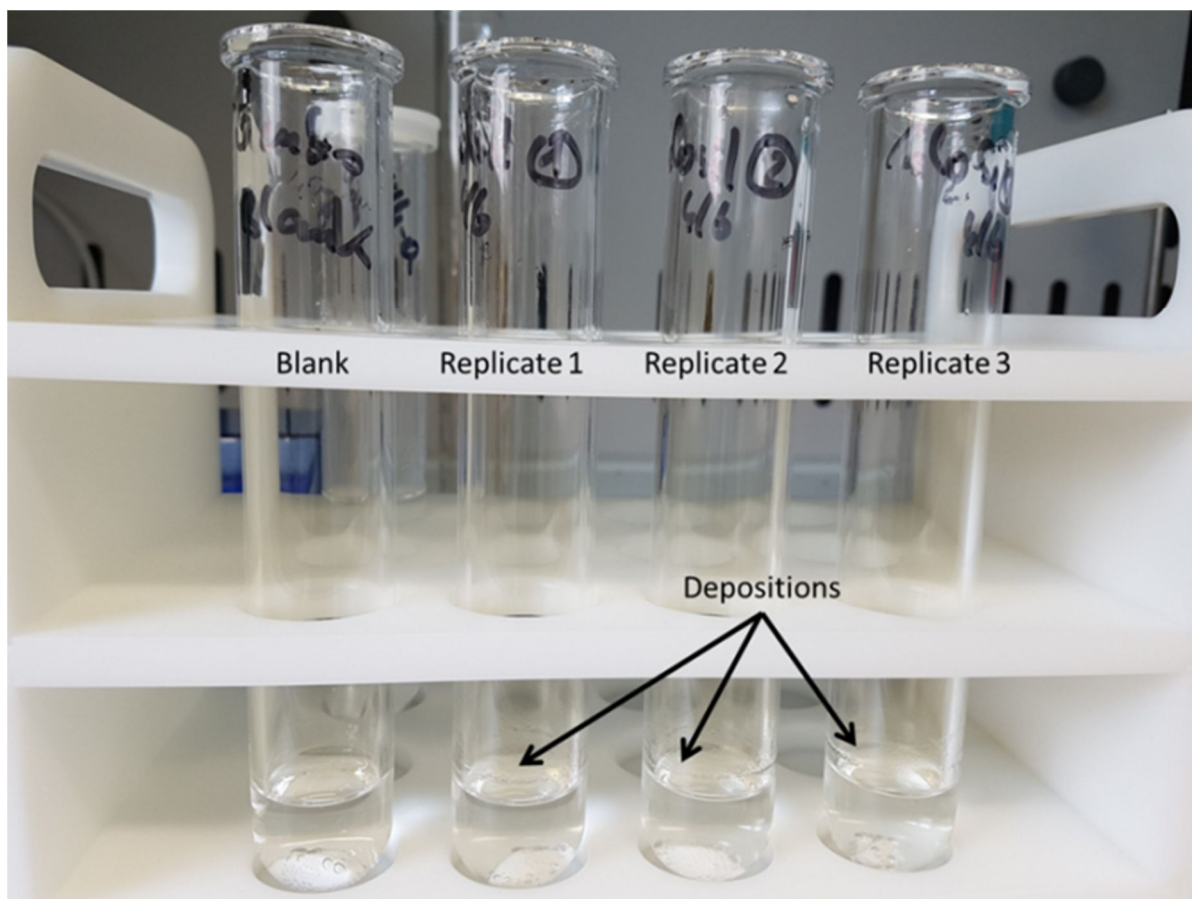

**Fig. S1** Hard to remove precipitates on the digestion tubes becoming visible after digestion

## Appearance of tomato sauce at different stages of the digestion process

The microwave assisted digestion was able to remove all organic matrix components. Already when adding nitric acid and hydrogen peroxide without heating, most of the matrix is decomposed resulting in a yellow, not completely clear extract. After the microwave assisted digestion, the extracts were clear and of yellowish colour.

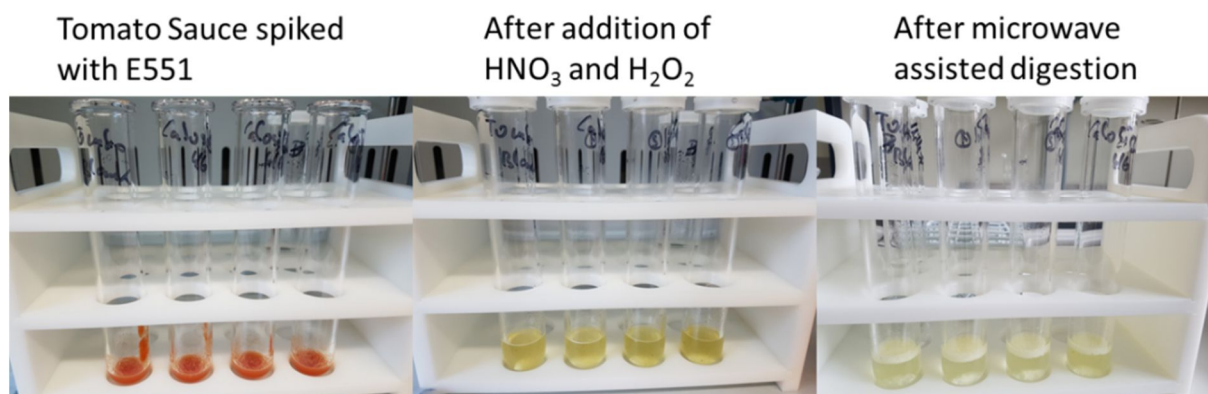

**Fig. S2** The spiked tomato sauce at three different stages. Left: before adding acid and hydrogen peroxide, centre: after adding acid and hydrogen peroxide but before microwave, right: after microwave assisted digestion
